# Supplementary material for: Groundwater Quality in Agricultural Lands Near a Rapidly Urbanized Area, South China
Source: MDPI journal article supplement (doi:10.3390/ijerph18041783), 2021-02-12
Supplement: s1 [file s1]

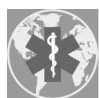

**Supplementary Table S1.** Bartlett's test for the suitability of PCA in groundwater chemical data of porous and fissured aquifers.

| Items                         | Porous Aquifers | Fissured Aquifers |
|-------------------------------|-----------------|-------------------|
| Bartlett's test of sphericity | 937.945         | 897.425           |
| Approximate chi-square        |                 |                   |
| Significance                  | 0.000           | 0.000             |

**Supplementary Table S2.** Standards for groundwater quality of China and drinking water quality of WHO and US EPA.

| Item                                 | Class I              | Class II             | Class III            | Allowable Limits of WHO | Allowable Limits of US EPA | Class IV   | Class V      |
|--------------------------------------|----------------------|----------------------|----------------------|-------------------------|----------------------------|------------|--------------|
| TDS (mg/L)                           | ≤300                 | ≤500                 | ≤1000                |                         | ≤500                       | ≤2000      | >2000        |
| Cl <sup>-</sup> (mg/L)               | ≤50                  | ≤150                 | ≤250                 |                         | ≤250                       | ≤350       | >350         |
| NO <sub>3</sub> <sup>-</sup> (mg/L)  | ≤8.9                 | ≤22.1                | ≤88.6                | ≤50                     | ≤44.3                      | ≤132.9     | >132.9       |
| Na <sup>+</sup> (mg/L)               | ≤100                 | ≤150                 | ≤200                 |                         |                            | ≤400       | >400         |
| SO <sub>4</sub> <sup>2-</sup> (mg/L) | ≤50                  | ≤150                 | ≤250                 |                         | ≤250                       | ≤350       | >350         |
| Fe (mg/L)                            | ≤0.1                 | ≤0.2                 | ≤0.3                 |                         | ≤0.3                       | ≤2         | >2           |
| Mn (mg/L)                            | ≤0.05                | ≤0.05                | ≤0.1                 |                         | ≤0.05                      | ≤1.5       | >1.5         |
| NH <sub>4</sub> <sup>+</sup> (mg/L)  | ≤0.026               | ≤0.13                | ≤0.64                |                         |                            | ≤1.93      | >1.93        |
| Zn (mg/L)                            | ≤0.05                | ≤0.5                 | ≤1                   |                         | ≤5                         | ≤5         | >5           |
| Pb (μg/L)                            | ≤5                   | ≤5                   | ≤10                  | ≤10                     | ≤15                        | ≤100       | >100         |
| Cu (μg/L)                            | ≤10                  | ≤50                  | ≤1000                | ≤2000                   | ≤1000                      | ≤1500      | >1500        |
| As (μg/L)                            | ≤1                   | ≤1                   | ≤10                  | ≤10                     | ≤10                        | ≤50        | >50          |
| I <sup>-</sup> (μg/L)                | ≤40                  | ≤40                  | ≤80                  |                         |                            | ≤500       | >500         |
| Hg (μg/L)                            | ≤0.1                 | ≤0.1                 | ≤1                   | ≤6                      | ≤2                         | ≤2         | >2           |
| Suitability                          | Drinking, Irrigation | Drinking, Irrigation | Drinking, Irrigation | Drinking, Irrigation    | Drinking, Irrigation       | Irrigation | Not suitable |

Data from General administration of quality supervision inspection and quarantine of the people's republic of China [20], World Health Organization [22], and United States Environmental Protection Agency [21].

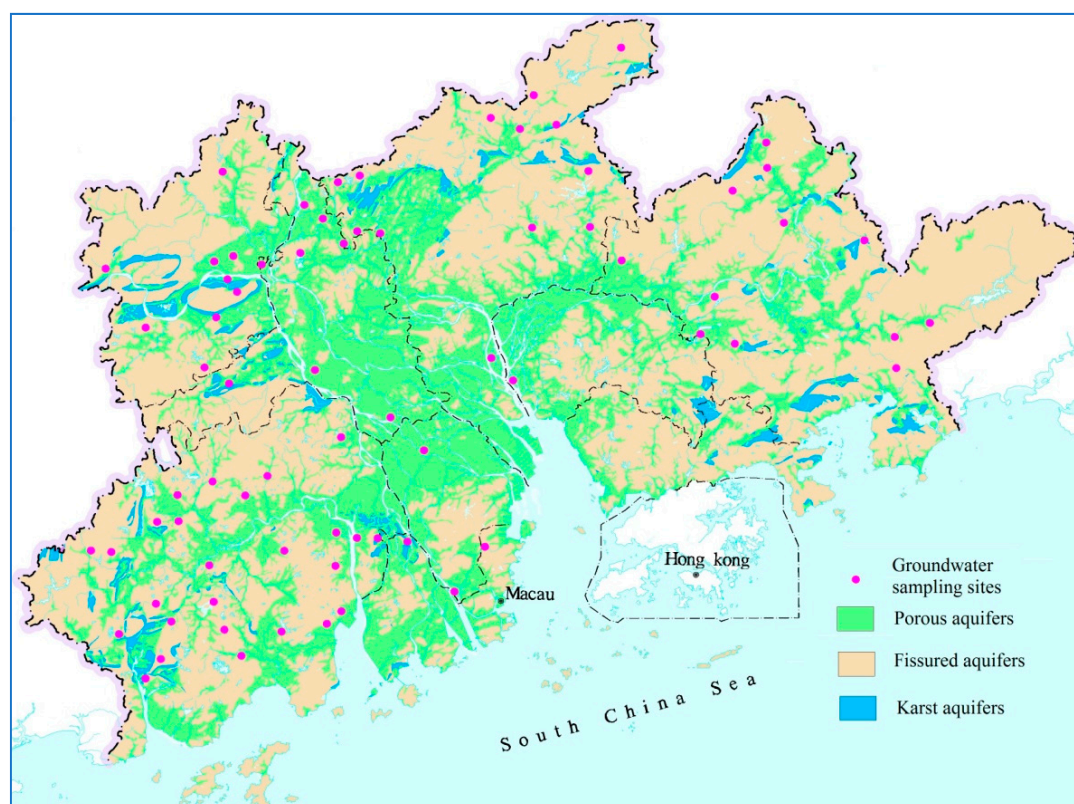

**Supplementary Figure S1.** Groundwater sampling sites in various aquifers in the Pearl River Delta.
